# Supplementary material
Source: PubMed Central journal article supplement (PMC6894059)
Supplement: fj.201900786R.sf1.pdf [file fj.201900786R.sf1.pdf]

## Supplemental Fig 1. Gene expression

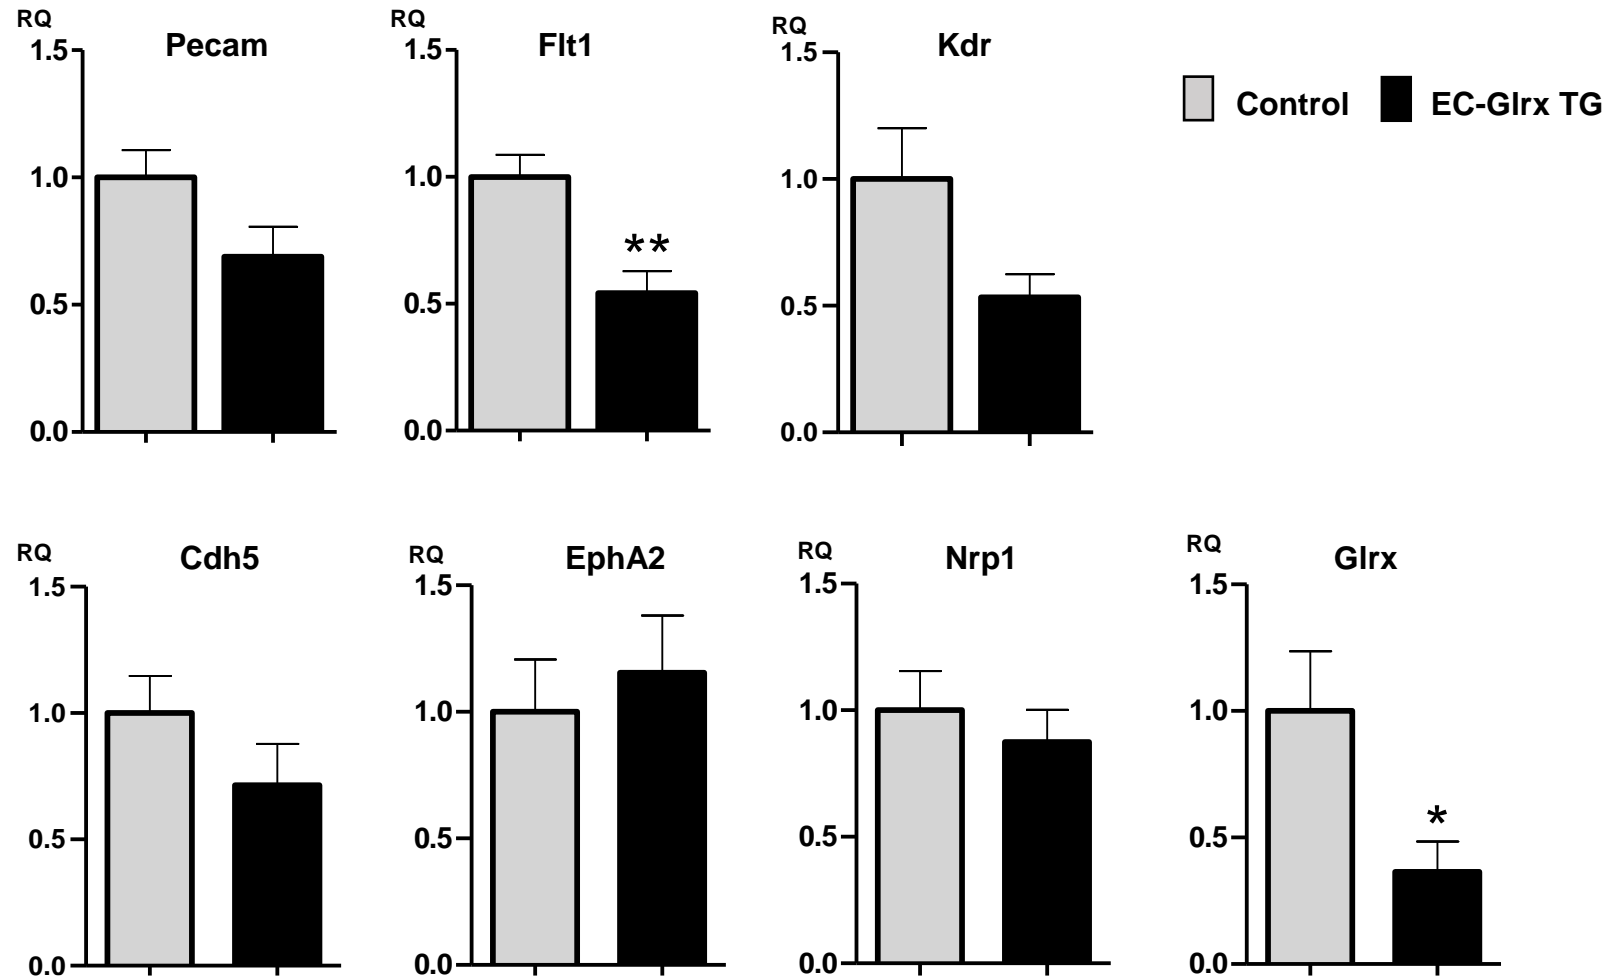

Gene expression of the B16F0 tumors from control (n=11-12) and EC-Glrx TG (n=7-8) mice. CD31 (Pecam), VEGF R1 (Flt1), VEGF R2 (Kdr), Cadherin 5 (Cdh5), Ephrin A2 (EphA2), Neuropilin-1 (Nrp1), Glutaredoxin-1 (Glrx) \* p<0.05. \*\* p<0.01, Relative quantity (RQ) was assessed as  $\beta$ -actin expression as an internal control.

## Supplemental Fig 2. Multiplex assay

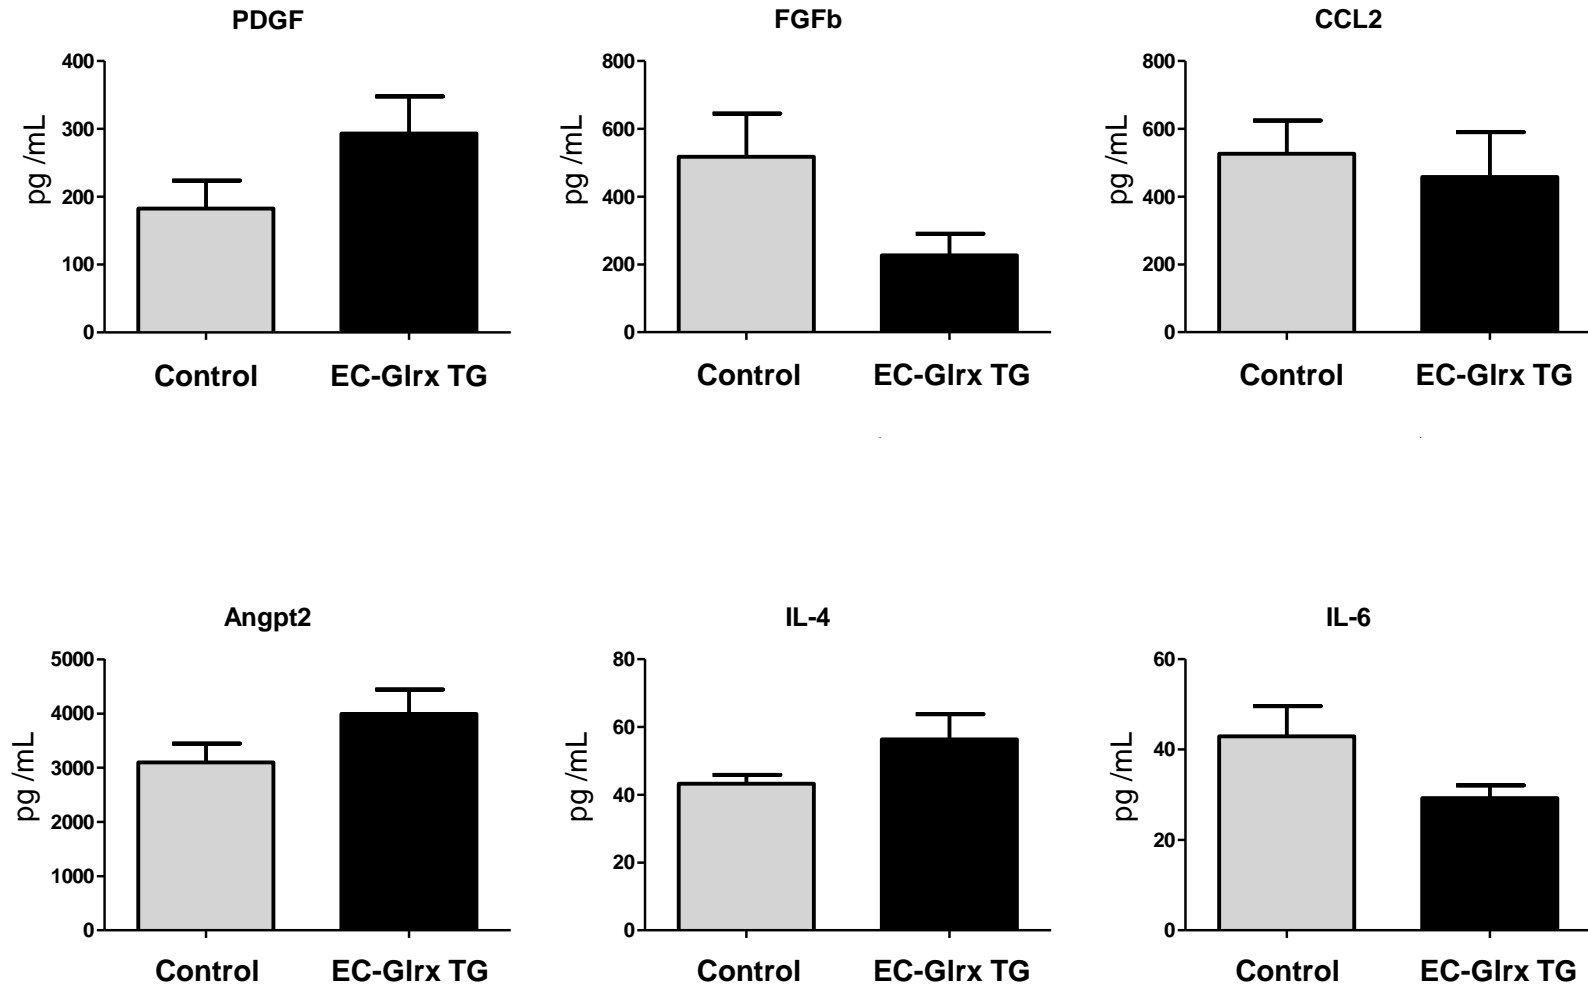

Protein levels (pg/ml) of tumors from control (n=12) and EC-Glrx TG (n=8) mice. PDGF: platelet derived growth factor, FGFb: basic fibroblast growth factor, CCL2: chemokine (C-C motif) ligand 2 /monocyte chemoattractant protein 1 (MCP1), Angpt2: angiopoietin 2, IL: interleukin. The levels of IL-10, TNF $\alpha$ , IL-1 $\beta$ , and IL-12p70 were lower than detection limits in all samples.

### Supplemental Fig 3. B16F0 *in vitro* network formation assay

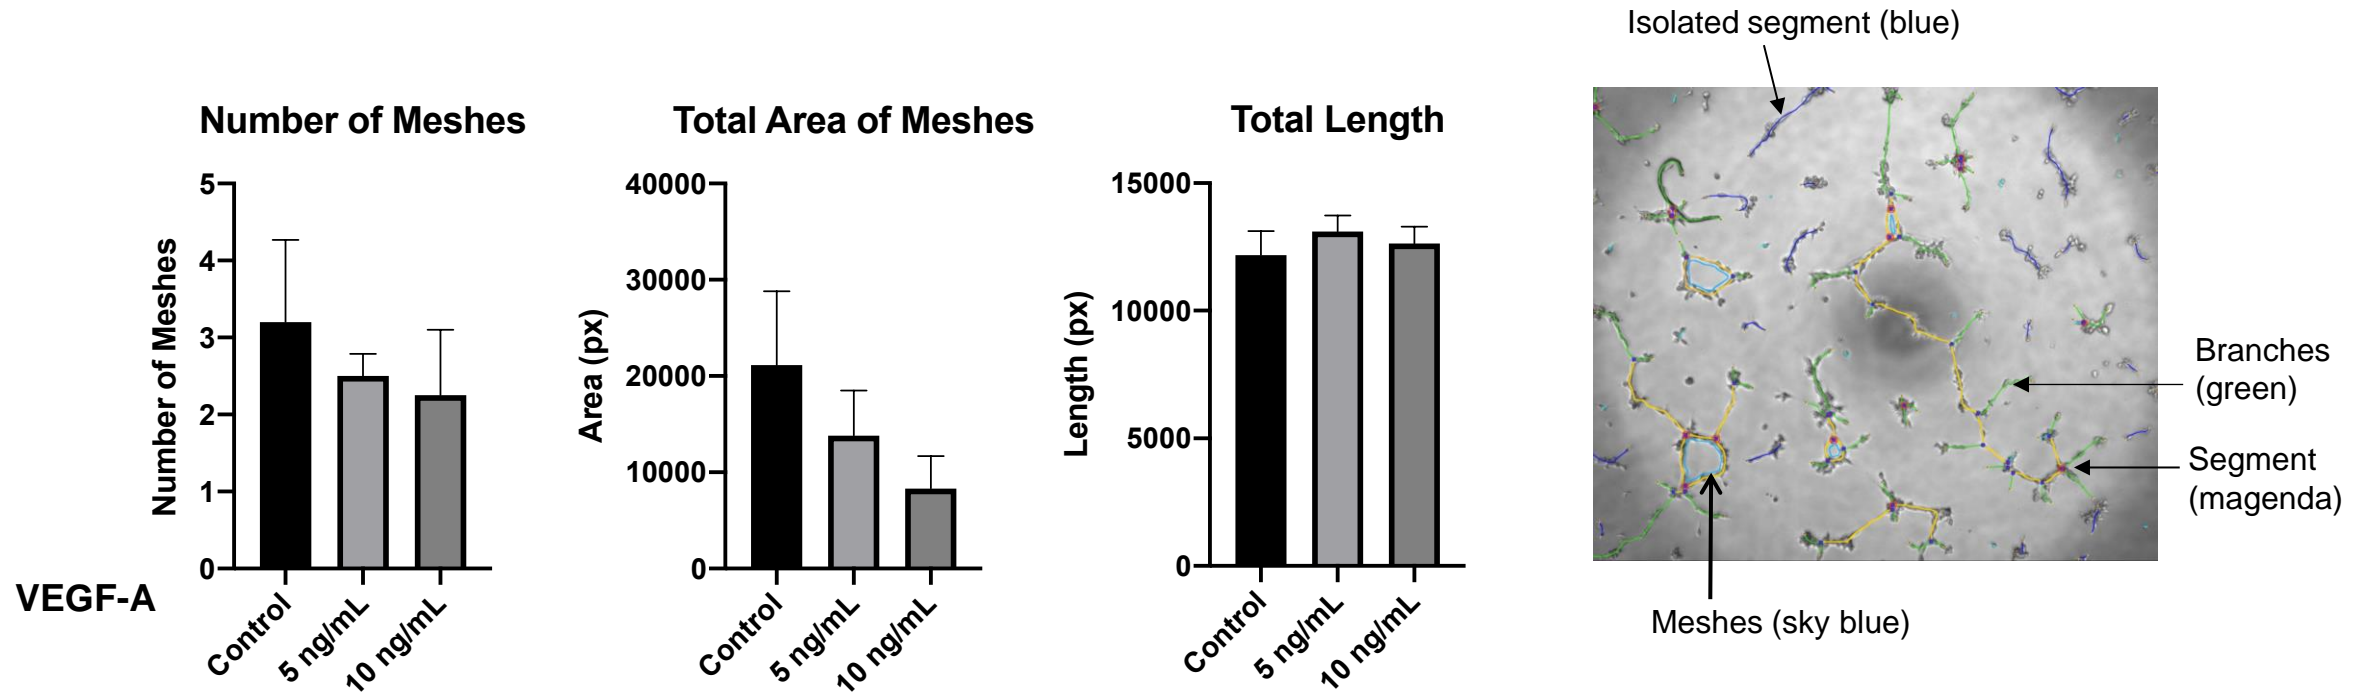

Area and length are expressed by pixels (N= 6 wells each,  $p > 0.05$ ). Meshes are indicated by sky blue in the photo. Total length is a sum of segment, branches and isolated branches.
